# Supplementary material
Source: PubMed Central journal article supplement (PMC130601)
Supplement: pnas_192319099_2.pdf [file pnas_192319099_2.pdf]

**Table 3. Frequency of single nucleotide polymorphisms (SNPs) between *Brucella suis* and *Brucella melitensis* and comparative SNP data between strains of sequenced bacterial species**

*B. suis* vs. *B. melitensis*

|   | A    | C    | G    | T    |
|---|------|------|------|------|
| A |      | 192  | 1327 | 130  |
| C | 265  |      | 253  | 1555 |
| G | 1499 | 240  |      | 257  |
| T | 113  | 1267 | 203  |      |

7,301 mutations over 3,238,849 bp

*S. pneumoniae* TIGR4 vs. R6

|   | A    | C    | G    | T    |
|---|------|------|------|------|
| A |      | 305  | 1552 | 158  |
| C | 327  |      | 115  | 1658 |
| G | 1625 | 112  |      | 311  |
| T | 174  | 1625 | 341  |      |

8,303 mutations over 1,859,345 bp

*N. meningitidis* MC58 vs. Z2491

|   | A    | C    | G    | T    |
|---|------|------|------|------|
| A |      | 250  | 1689 | 109  |
| C | 272  |      | 226  | 1646 |
| G | 1685 | 187  |      | 293  |
| T | 85   | 1699 | 317  |      |

8,458 mutations over 1,080,323 bp

*E. coli* K12 vs. O157:H7

|   | A    | C    | G    | T    |
|---|------|------|------|------|
| A |      | 1318 | 6701 | 1248 |
| C | 1463 |      | 854  | 6730 |
| G | 6919 | 903  |      | 1384 |
| T | 1316 | 6520 | 1320 |      |

36,676 mutations over 3,864,033 bp

*C. pneumoniae* AR39 vs J138

|   | A  | C  | G  | T  |
|---|----|----|----|----|
| A |    | 24 | 27 | 20 |
| C | 7  |    | 6  | 15 |
| G | 2  | 10 |    | 16 |
| T | 19 | 28 | 27 |    |

201 mutations over 1,222,654 bp

*H. pylori* 26695 vs J99

|   | A    | C    | G    | T    |
|---|------|------|------|------|
| A |      | 430  | 3666 | 199  |
| C | 367  |      | 268  | 3073 |
| G | 3144 | 267  |      | 395  |
| T | 209  | 3603 | 425  |      |

16,046 mutations over 956,529 bp
