# Supplementary material
Source: PubMed Central journal article supplement (PMC130601)
Supplement: pnas_192319099_3.pdf [file pnas_192319099_3.pdf]

**Table 4. Number of *Brucella suis* proteins encoded on chromosomes 1 and 2 with significant matches ( $P < 10^{-15}$ ) to proteins encoded on the chromosomes and additional replicons of *Mesorhizobium loti*, *Sinorhizobium meliloti*, and *Agrobacterium tumefaciens***

|                       | <i>M. loti</i> |      |      | <i>S. meliloti</i> |       |       | <i>A. tumefaciens</i> |            |        |        |
|-----------------------|----------------|------|------|--------------------|-------|-------|-----------------------|------------|--------|--------|
|                       | Chr            | pMLa | pMLb | Chr                | pSymA | pSymB | Circular Chr          | Linear Chr | pAtC58 | pTiC58 |
| <i>B. suis</i> Chr I  | 1471           | 4    | 3    | 1299               | 106   | 30    | 1160                  | 242        | 18     | 4      |
| <i>B. suis</i> Chr II | 670            | 15   | 3    | 466                | 162   | 88    | 336                   | 339        | 32     | 9      |
