# Supplementary material
Source: PubMed Central journal article supplement (PMC130601)
Supplement: pnas_192319099_5.pdf [file pnas_192319099_5.pdf]

**Table 5. Genes predicted to encode virulence-associated functions**

| <i>Brucella suis</i> ORF                                                                                                           | Putative function                                                                                                                                                                                                                                                                                                            |
|------------------------------------------------------------------------------------------------------------------------------------|------------------------------------------------------------------------------------------------------------------------------------------------------------------------------------------------------------------------------------------------------------------------------------------------------------------------------|
| ADHESION, OMP*<br>BRA0173, BRA1148, BR2013<br><br>BR0971, BR0118, BR0119<br>BR1689, BRA0921<br>BR0072<br>BRA0423, BR1622<br>BR0701 | Adhesin with autotransporter domain, similar to <i>Salmonella typhimurium</i> ShdA<br>Adhesin, similar to <i>Bartonella henselae</i> surface proteins<br>Putative surface exposed protein, signal peptide<br>Putative outer membrane protein<br>OMP31<br>OMP25                                                               |
| INVASION, TRAFFICKING<br>BR1836, BR0340<br><br>BR0437, BR0068,<br>BR0337, BR1792                                                   | Invasin, similar to <i>Bartonella clarridgeiae</i> invasion protein<br>Hemolysins<br>Proline racemase, similarity to <i>Trypanosoma cruzi</i> protein with B-cell mitogenic properties                                                                                                                                       |
| DETOXIFICATION<br>BR1837<br><br>BR0566<br>BRA0707, BRA0708<br>BR0267-BR0273<br>BR1356-BR1361                                       | Carboxy-terminal protease, <i>Bartonella bacilliformis</i> homologue implicated in stress protection<br>Fe-Mn Superoxide dismutase<br>Alkyl hydroperoxide reductase<br>Urease, similar to <i>Mesorhizobium loti</i> , <i>Agrobacterium tumefaciens</i><br>Urease, similar to <i>Yersinia</i> spp., <i>Heliobacter pylori</i> |
| OTHERS<br>BR1654<br>BR0364, BR2174<br>BRA1125<br>BR1441                                                                            | Ferric uptake regulator<br>Iron response regulator, heme biosynthesis, iron uptake<br>Transcriptional regulator, Fur family<br>Mn <sup>2+</sup> /Fe <sup>2+</sup> transporter, NRAMP family                                                                                                                                  |

\*OMP, outer membrane protein.
