# Supplementary material
Source: PubMed Central journal article supplement (PMC130601)

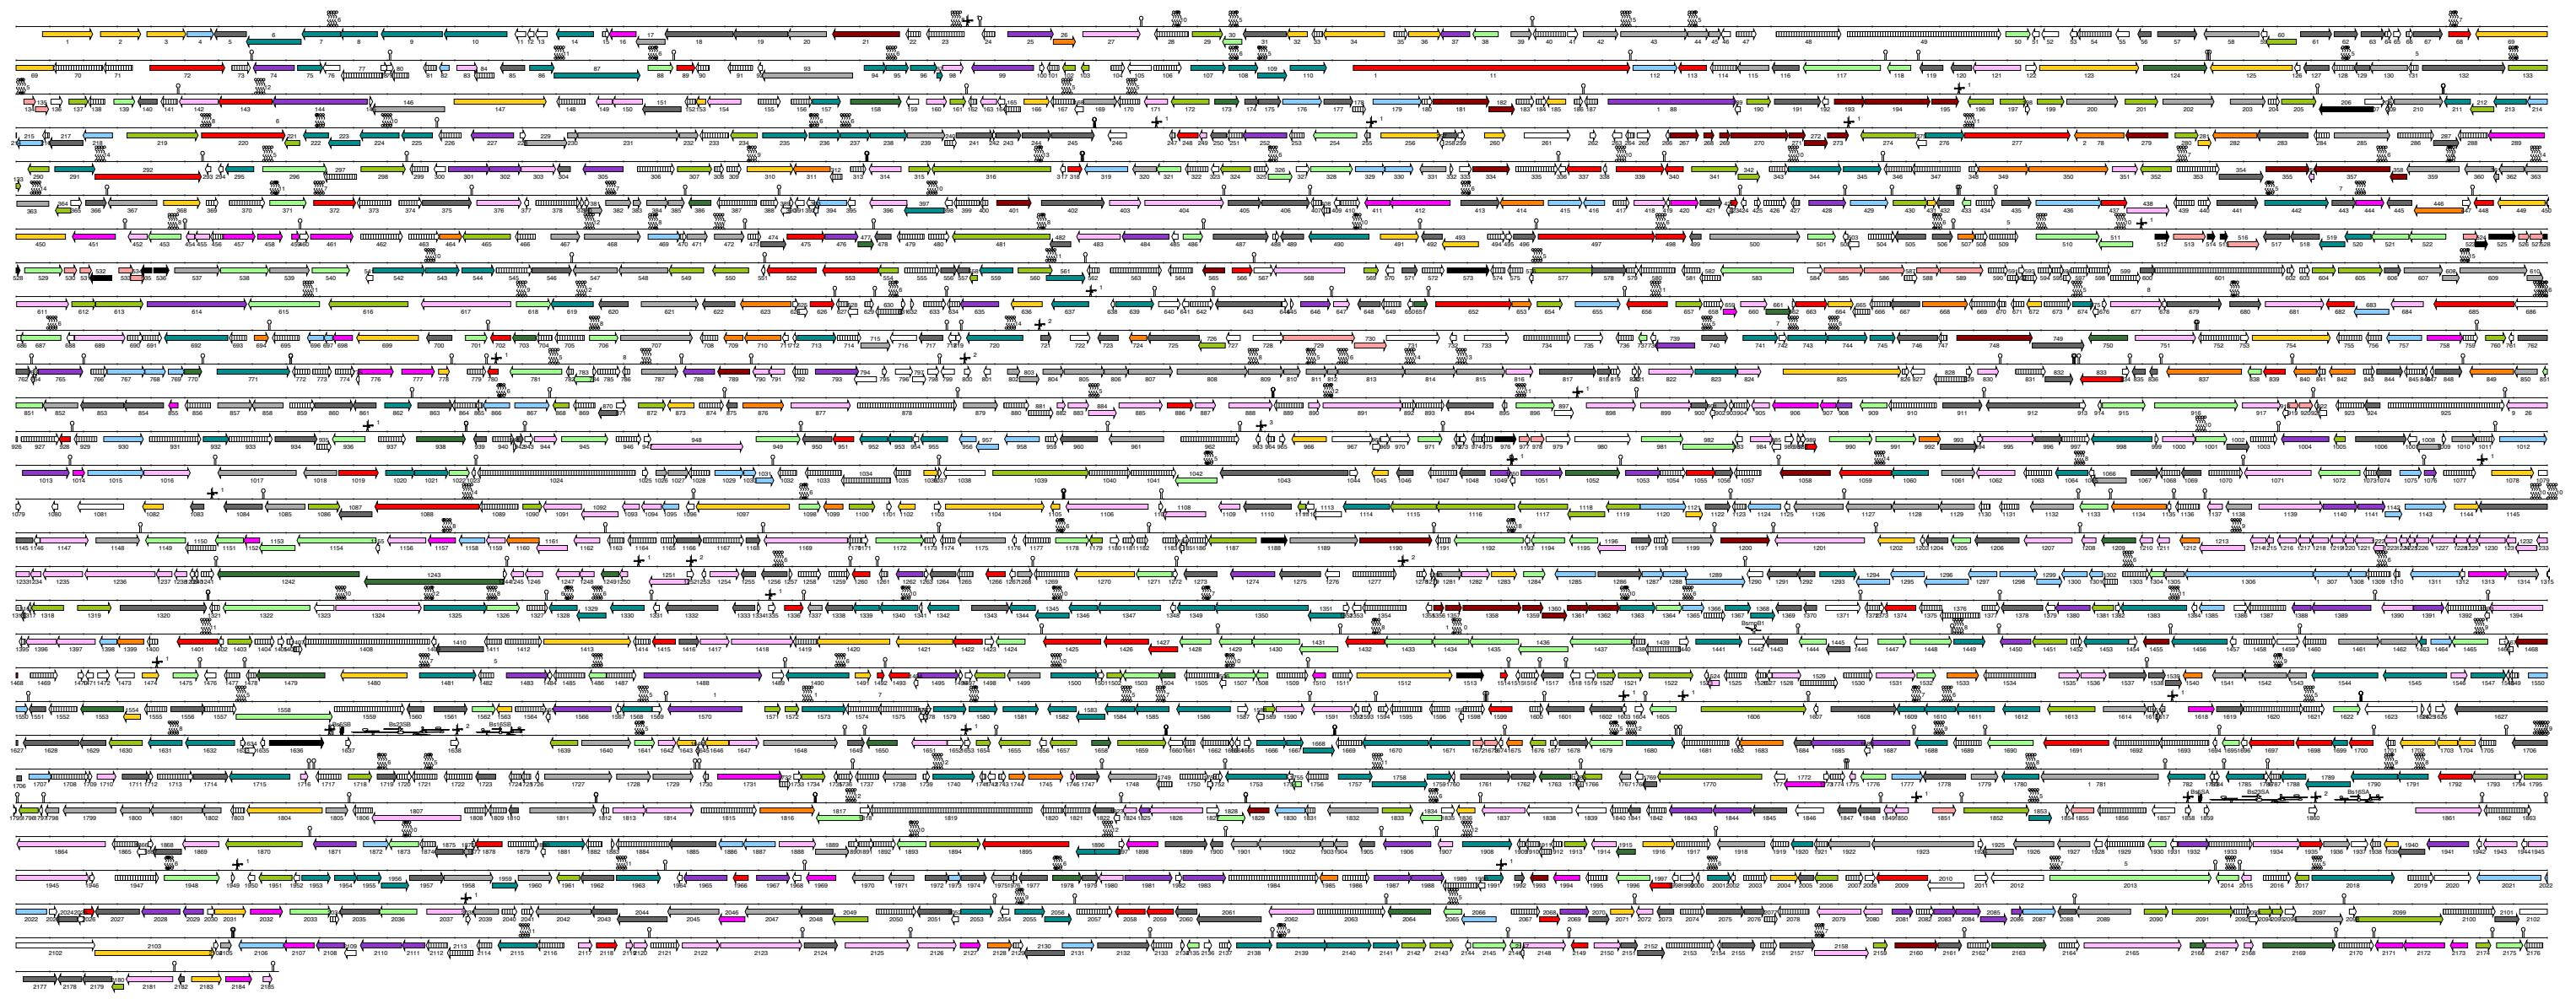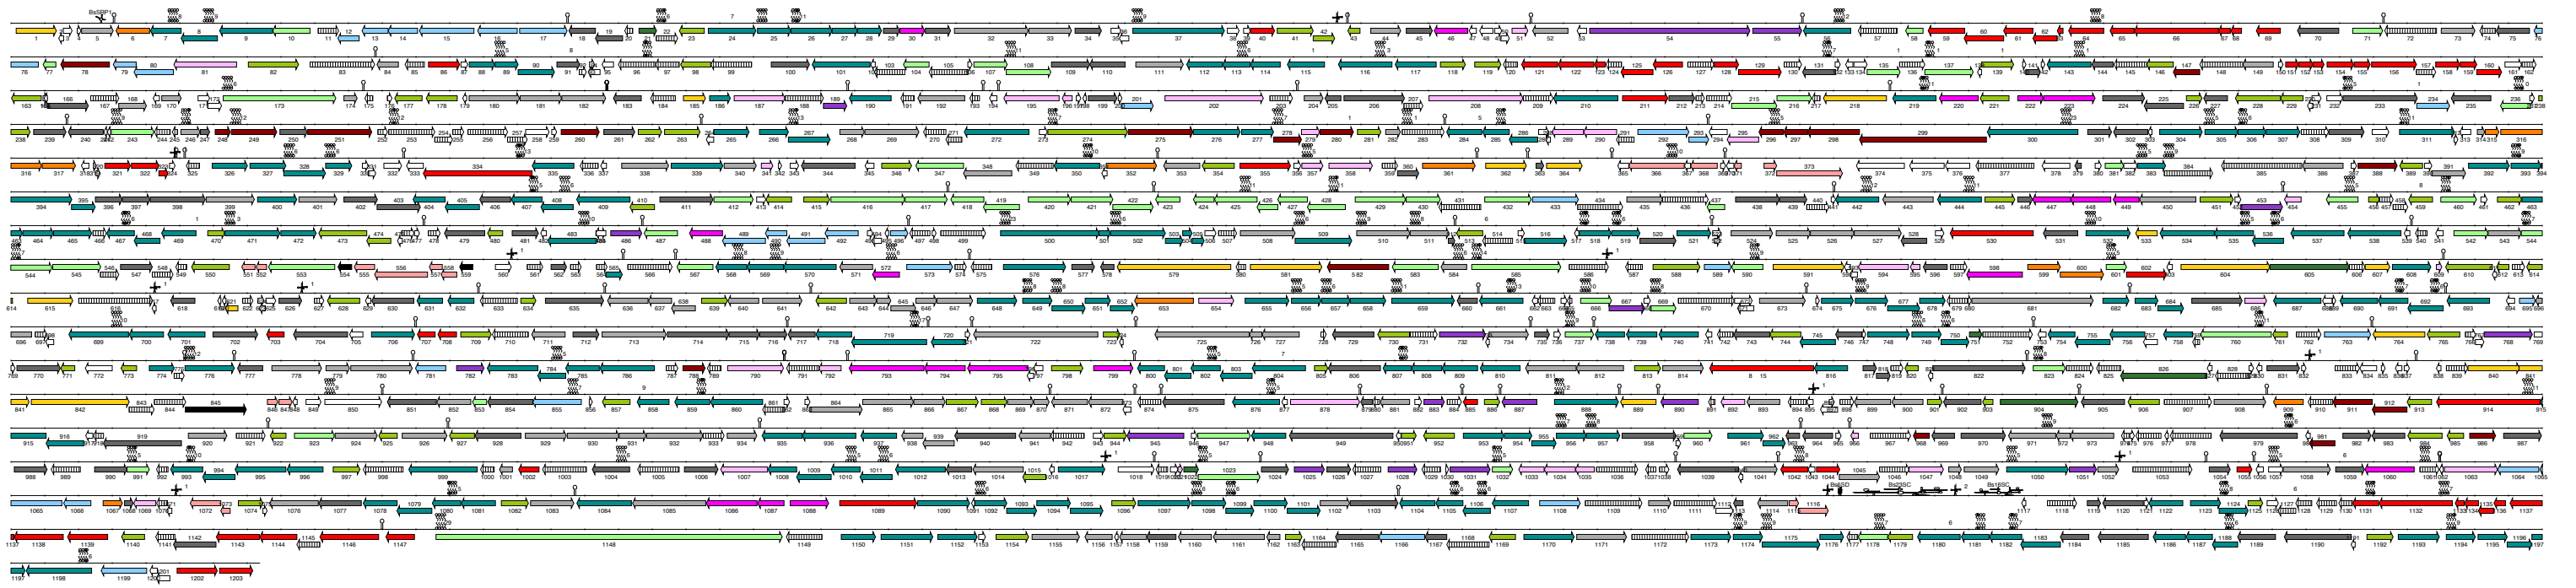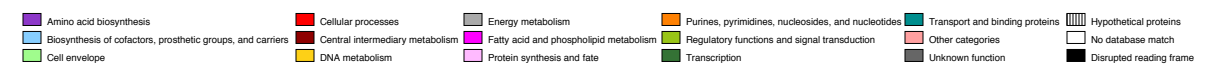

Supplement: pnas_192319099_7.pdf [file pnas_192319099_7.pdf]
